# Supplementary material
Source: Springer Nature journal article supplement (https://www.springermedizin.de/resource/supplementary/13012_2006_28_MOESM3_ESM.pdf/9628922)

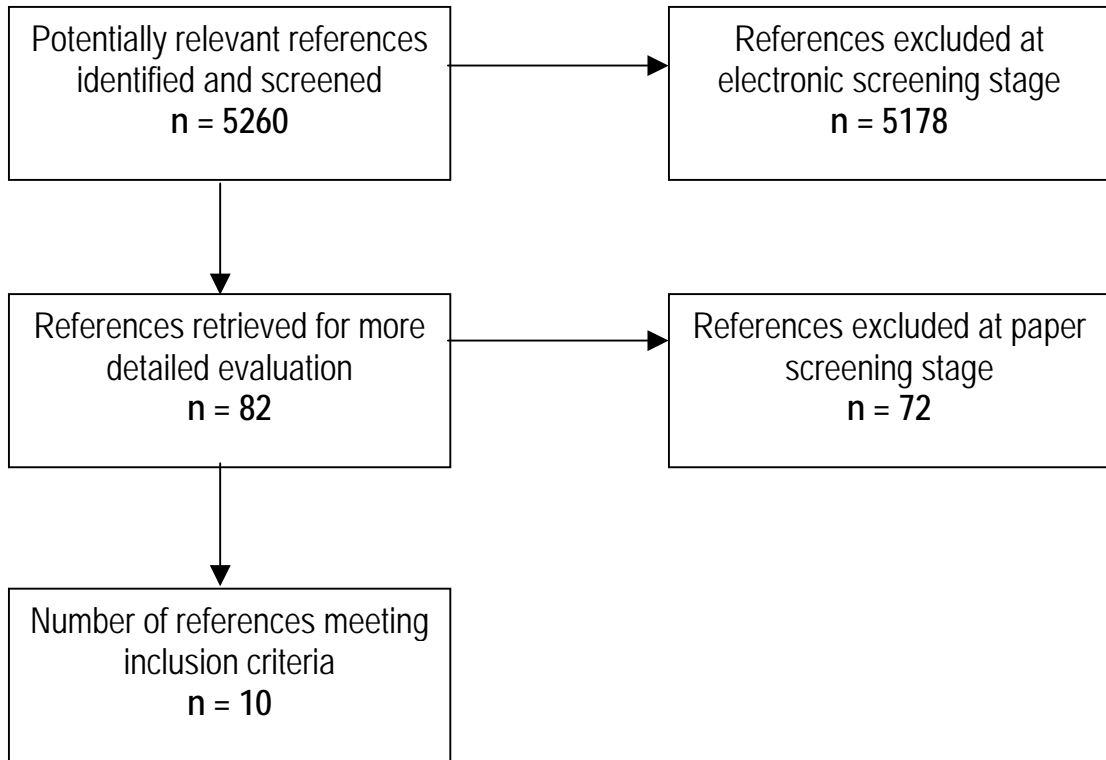

Supplement: MOESM3 [file 9628922]
